1  
2  
3  
4  
5  
6  
7  
8  
9  
10  
11  
12  
13  
14  
15  
16  
17

## **Songbirds can learn flexible contextual control over syllable sequencing**

Lena Veit<sup>1,2\*</sup>, Lucas Y Tian<sup>1,3</sup>, Christian J Monroy Hernandez<sup>1</sup>, Michael S Brainard<sup>1\*</sup>

<sup>1</sup>Center for Integrative Neuroscience, University of California, San Francisco, USA and  
Howard Hughes Medical Institute

<sup>2</sup>Current address: Institute for Neurobiology, University of Tübingen, Germany

<sup>3</sup>Current address: The Rockefeller University, New York, NY, USA

\*Correspondence: [lena.veit@uni-tuebingen.de](mailto:lena.veit@uni-tuebingen.de), [msb@phy.ucsf.edu](mailto:msb@phy.ucsf.edu)

18 **Abstract**

19

20 The flexible control of sequential behavior is a fundamental aspect of speech, enabling endless  
21 reordering of a limited set of learned vocal elements (syllables or words). Songbirds are  
22 phylogenetically distant from humans but share both the capacity for vocal learning and neural  
23 circuitry for vocal control that includes direct pallial-brainstem projections. Based on these  
24 similarities, we hypothesized that songbirds might likewise be able to learn flexible, moment-  
25 by-moment control over vocalizations. Here, we demonstrate that Bengalese finches (*Lonchura*  
26 *striata domestica*), which sing variable syllable sequences, can learn to rapidly modify the  
27 probability of specific sequences (e.g. ‘ab-c’ versus ‘ab-d’) in response to arbitrary visual cues.  
28 Moreover, once learned, this modulation of sequencing occurs immediately following changes  
29 in contextual cues and persists without external reinforcement. Our findings reveal a capacity  
30 in songbirds for learned contextual control over syllable sequencing that parallels human  
31 cognitive control over syllable sequencing in speech.

## 32 **Introduction**

33 A crucial aspect of the evolution of human speech is the development of flexible control over  
34 learned vocalizations (Ackermann, Hage, & Ziegler, 2014; Belyk & Brown, 2017). Humans  
35 have unparalleled control over their vocal output, with a capacity to reorder a limited number  
36 of learned elements to produce an endless combination of vocal sequences that are appropriate  
37 for current contextual demands (Hauser, Chomsky, & Fitch, 2002). This cognitive control over  
38 vocal production is thought to rely on the direct innervation of brainstem and midbrain vocal  
39 networks by executive control structures in the frontal cortex, which have become more  
40 elaborate over the course of primate evolution (Hage & Nieder, 2016; Simonyan & Horwitz,  
41 2011). However, because of the comparatively limited flexibility of vocal production in  
42 nonhuman primates (Nieder & Mooney, 2020), the evolutionary and neural circuit mechanisms  
43 that have enabled the development of this flexibility remain poorly understood.

44  
45 Songbirds are phylogenetically distant from humans, but they have proven a powerful model  
46 for investigating neural mechanisms underlying learned vocal behavior. Song learning exhibits  
47 many parallels to human speech learning (Doupe & Kuhl, 1999); in particular, juveniles need  
48 to hear an adult tutor during a sensitive period, followed by a period of highly variable sensory-  
49 motor exploration and practice, during which auditory feedback is used to arrive at a precise  
50 imitation of the tutor song (Brainard & Doupe, 2002). This capacity for vocal learning is  
51 subserved by a well-understood network of telencephalic song control nuclei. Moreover, as in  
52 humans, this vocal control network includes strong projections directly from cortical (pallial)  
53 to brainstem vocal control centers (Doupe & Kuhl, 1999; Simonyan & Horwitz, 2011). These  
54 shared behavioral features and neural specializations raise the question of whether songbirds  
55 might also share the capacity to learn flexible control over syllable sequencing.

56

57 Contextual variation of song in natural settings, such as territorial counter-singing or female-  
58 directed courtship song, indicate that songbirds can rapidly alter aspects of their song, including  
59 syllable sequencing and selection of song types (Chen, Matheson, & Sakata, 2016; Heinig et  
60 al., 2014; King & McGregor, 2016; Sakata, Hampton, & Brainard, 2008; Searcy & Beecher,  
61 2009; Trillo & Vehrencamp, 2005). However, such modulation of song structure is often  
62 described as affectively controlled (Berwick, Okanoya, Beckers, & Bolhuis, 2011; Nieder &  
63 Mooney, 2020). For example, the presence of potential mates or rivals elicits a global and  
64 unlearned modulation of song intensity (James, Dai, & Sakata, 2018a) related to the singer's  
65 level of arousal or aggression (Alcami, Ma, & Gahr, 2021; Heinig et al., 2014; Jaffe & Brainard,  
66 2020). Hence, while prior observations suggest that a variety of ethologically relevant factors  
67 can be integrated to influence song production in natural settings, it remains unclear whether  
68 song can be modified more flexibly by learned or cognitive factors.

69  
70 Here, we tested whether Bengalese finches can learn to alter specifically targeted vocal  
71 sequences within their songs in response to arbitrarily chosen visual cues, independently of  
72 social or other natural contexts. Each Bengalese finch song repertoire includes ~5-12  
73 acoustically distinct elements ('syllables') that are strung together into sequences in variable  
74 but non-random order. For a given bird, the relative probabilities of specific transitions between  
75 syllables normally remain constant over time (Okanoya, 2004; Warren, Charlesworth, Tumer,  
76 & Brainard, 2012), but previous work has shown that birds can gradually adjust the probabilities  
77 of alternative sequences in response to training that reinforces the production of some sequences  
78 over others. In this case, changes to syllable sequencing develop over a period of hours to days  
79 (Warren et al., 2012). In contrast, we investigate here whether birds can learn to change syllable  
80 sequencing on a moment-by-moment basis in response to arbitrary visual cues that signal which  
81 sequences are adaptive at any given time. Our findings reveal that songbirds can learn to

82 immediately, flexibly, and adaptively adjust the sequencing of selected vocal elements in  
83 response to learned contextual cues.

84

## 85 **Results**

86

### 87 **Bengalese finches can learn context-dependent syllable sequencing**

88 For each bird in the study, we first identified variably produced syllable sequences that could  
89 be gradually modified using a previously described aversive reinforcement protocol (“single  
90 context training”; Tumer & Brainard, 2007; Warren et al., 2012). For example, a bird that  
91 normally transitioned from the fixed syllable sequence ‘ab’ to either ‘c’ or ‘d’ (**Figures 1A,B**,  
92 sequence probability of ~36% for ‘ab-c’ and ~64% for ‘ab-d’), was exposed to an aversive burst  
93 of white noise (WN) feedback immediately after the “target sequence” ‘ab-d’ was sung. In  
94 response, the bird learned over a period of days to gradually decrease the relative probability of  
95 that sequence in favor of the alternative sequence ‘ab-c’ (**Fig. 1C**). This change in sequence  
96 probabilities was adaptive in that it enabled the bird to escape from WN feedback. Likewise,  
97 when the sequence, ‘ab-c’ was targeted, the probability of ‘ab-d’ increased gradually over  
98 several days of training (**Fig. 1D**). These examples are consistent with prior work that showed  
99 such sequence modifications develop over a period of several days, with the slow time course  
100 suggesting a gradual updating of synaptic connections within syllable control networks in  
101 response to performance-related feedback (Warren et al., 2012). In contrast, the ability to  
102 immediately and flexibly reorder vocal elements in speech must reflect mechanisms that enable  
103 contextual factors to exert moment-by-moment control over selection and sequencing of  
104 alternative vocal motor programs. Having identified sequences for each bird for which the  
105 probability of production could be gradually modified in this manner, we then tested whether  
106 birds could be trained to rapidly switch between those same sequences in a context-dependent  
107 manner.

108

109 To determine whether Bengalese finches can learn to flexibly select syllable sequences on a  
110 moment-by-moment basis, we paired WN targeting of specific sequences with distinct  
111 contextual cues. In this context-dependent training protocol, WN was targeted to defined  
112 sequences in the bird's song as before, but the specific target sequence varied across alternating  
113 blocks, signaled by different colored lights in the home cage (see Methods). **Figure 1E** shows  
114 an example experiment, with 'ab-d' targeted in yellow light, and 'ab-c' in green light. At  
115 baseline, without WN, switches between yellow and green contexts (at random intervals of 0.5-  
116 1.5 hours) did not lead to significant changes in the relative proportion of the target sequences,  
117 indicating that there was no inherent influence of the light cues on sequence probabilities  
118 (**Fig. 1F**,  $p(\text{ab-d})$  in yellow vs. green context was  $67\pm 1.6\%$  vs.  $64\pm 1.5\%$ ,  $p = 0.17$ , ranksum  
119 test,  $n=53$  context blocks from baseline period). Training was then initiated in which WN was  
120 alternately targeted to each sequence, over blocks that were signaled by light cues. After 2  
121 weeks of such context-specific training, significant sequencing differences developed between  
122 light contexts that were appropriate to reduce aversive feedback in each context (**Fig. 1G**,  $p(\text{ab-}$   
123  $\text{d})$  in yellow vs. green context shifted to  $36.5\pm 4.8\%$  vs.  $83.1\pm 3.5\%$ ,  $p < 0.01$ , ranksum test,  
124  $n=22$  context blocks, block duration between 1-2.5 hours). Likewise, for all birds trained on  
125 this protocol ( $n=8$ ), context-dependent sequencing differences developed in the appropriate  
126 direction over a period of weeks ( $27\pm 6\%$  difference in probabilities between contexts after a  
127 mean of 33 days training, versus  $1\pm 2\%$  average difference in probabilities at baseline;  
128  $p < 0.01$ ,  $n=8$ , signed rank test, **Fig. 1H**). Thus, Bengalese finches are able to learn context-  
129 specific modifications to syllable sequencing.

130

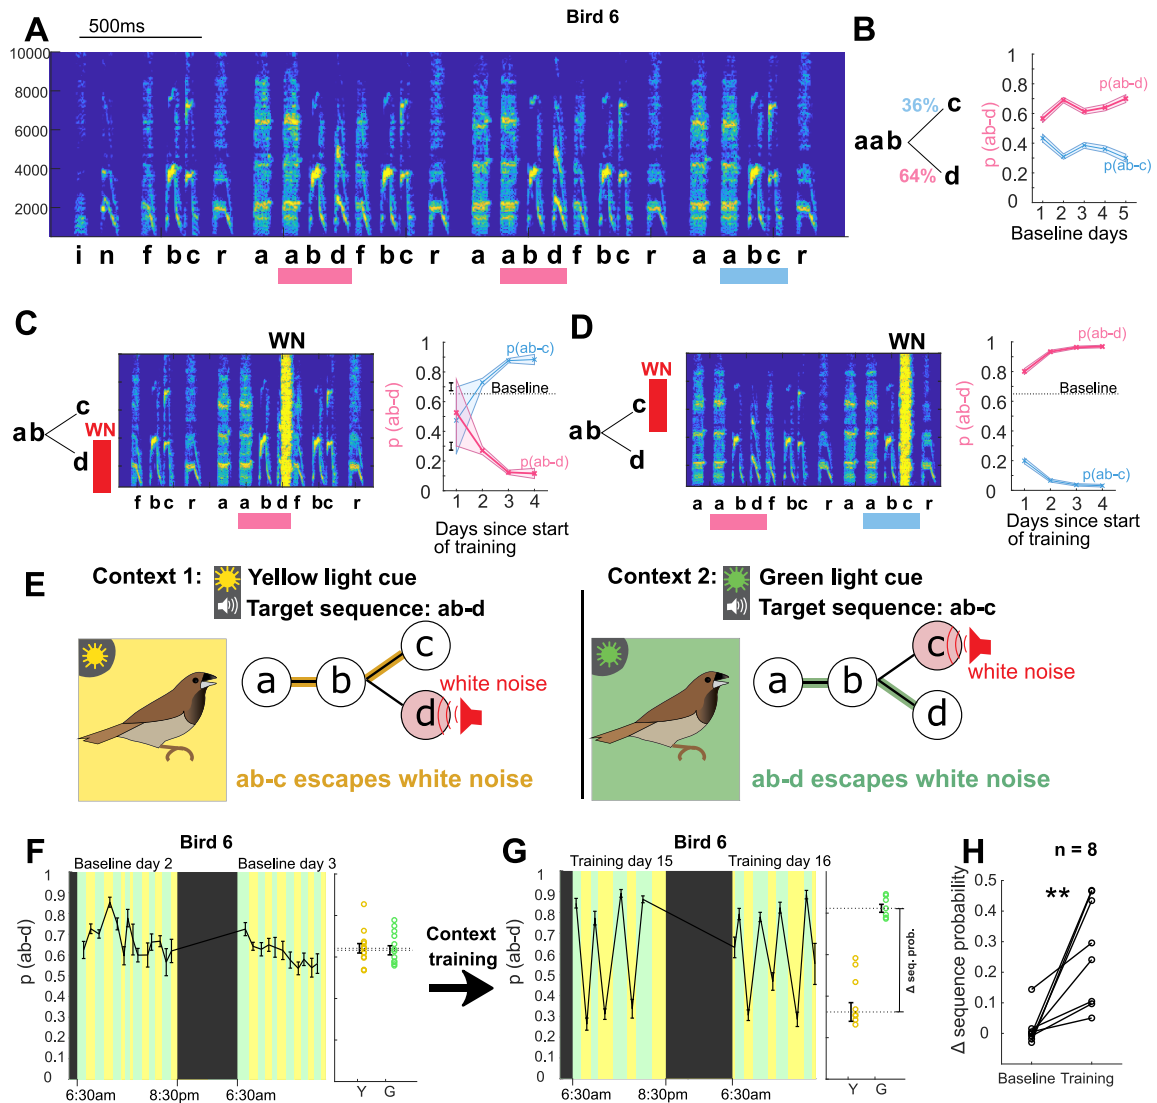

131

132 **Figure 1. Bengalese finches can learn context-dependent sequencing**

133 **A:** Example spectrogram highlighting points in the song with variable sequencing.  
 134 Individual syllables are labeled based on their spectral structure, and target sequences for  
 135 the different experiments (ab-c and ab-d) are marked with colored bars. Scale for x-axis  
 136 is 500ms and y-axis shows frequency in Hz. **B:** Transition diagram with probabilities for  
 137 the sequences ab-c and ab-d. The sequence probability of ab-d (and likewise of the  
 138 complementary probability ab-c) stayed relatively constant over five days of baseline  
 139 song recordings. Shaded area shows 95% confidence interval for sequence probability. **C:**  
 140 Aversive reinforcement training. Schematic showing aversive WN after target sequence  
 141 ab-d is sung; spectrogram shows actual WN stimulus, covering part of syllable d. WN  
 142 targeted to the sequence ab-d led to a gradual reduction in the probability of that  
 143 sequence over several days, and a complementary increase in the probability of ab-c. **D:**  
 144 In a subsequent experiment, WN targeted to the sequence ab-c led to a gradual increase  
 145 in the sequence probability of ab-d over several days. **E:** Schematic of the contextual  
 146 learning protocol, in which the target for WN is signaled by colored lights. **F:** Left: Two  
 147 example days of baseline without WN but with alternating blocks of green and yellow  
 148 context. Colors indicate light context (black indicates periods of lights off during the  
 149 night), error bars indicate SEM across song bouts in each block. Right: Average sequence  
 150 probability in yellow and green blocks during baseline. Open circles show data from

151 individual blocks of yellow and green context, error bars indicate SEM across blocks. **G:**  
152 Left: Two example days after training (WN on) with alternating blocks of green and yellow  
153 context, as in F. Right: Average sequence probability in yellow and green blocks after  
154 training, as in F. **H:** Contextual difference in sequence probability for eight trained birds  
155 before and after training (\*\*  $p < 0.01$  signed rank test).  
156

### 157 **Syllable sequencing shifts immediately following switches in context**

158 Contextual differences between different blocks could arise through an immediate shift in  
159 sequence probabilities upon entry into a new context and/or by rapid learning within each block.

160 We examined whether trained birds exhibited any immediate shifts in their syllable sequencing  
161 when entering a new light context by computing the average probability of target sequences  
162 across songs aligned with the switch between contexts (**Fig. 2A,B**, example experiment). This  
163 “switch-triggered average” revealed that across all birds, switches to the yellow context were  
164 accompanied by an immediate decrease in the probability of the yellow target sequence,  
165 whereas switches out of the yellow context (and into the green context) led to an immediate  
166 increase in the yellow target sequence (**Fig. 2C,D**,  $p < 0.05$ , signed rank test comparing first  
167 and last song,  $n=8$ ). To quantify the size of these immediate shifts, we calculated the difference  
168 in sequence probability from the last five songs in the previous context to the first five songs in  
169 the current context; this difference averaged  $0.24 \pm 0.06$  for switches to green light and  $-0.22 \pm$   
170  $0.06$  for switches to yellow light (**Fig. 2 E,F**). These results indicate that birds could learn to  
171 immediately recall an acquired memory of context-appropriate sequencing upon entry into each  
172 context, even before having the chance to learn from reinforcing feedback within that context.

173  
174 We next asked whether training additionally led to an increased rate of learning within each  
175 context, which also might contribute to increased contextual differences over time. Indeed, such  
176 faster re-learning for consecutive encounters of the same training context, or ‘savings’, is  
177 sometimes observed in contextual motor adaptation experiments (Lee & Schweighofer, 2009).  
178 To compare the magnitude of the immediate shift and the magnitude of within-block learning



179 over the course of training, we plotted the switch-aligned sequence probabilities at different  
180 points in the training process. **Figure 2G** shows for the example bird that the magnitude of the  
181 shift (computed between the first and last five songs across context switches) gradually  
182 increased over 11 days of training. **Figure 2H** shows the switch-aligned sequence probability  
183 trajectories (as in **Fig. 2A,B**) for this bird early in training (red) and late in training (blue),  
184 binned into groups of 7 context switches. Qualitatively, there was both an abrupt change in  
185 sequence probability at the onset of each block (immediate shift at time point 0) and a gradual  
186 adjustment of sequence probability within each block (within-block learning over the first 80  
187 songs following light switch). Over the course of training, the immediate shift at the onset of  
188 each block got larger, while the gradual change within blocks stayed approximately the same  
189 (learning trajectories remained parallel over training, **Fig. 2H**). Linear fits to the sequence  
190 probabilities for each learning trajectory (i.e. the right side of **Fig. 2H**) reveal that, indeed, the  
191 change in sequence probability at the onset of blocks (i.e. intercepts) increased over the training  
192 process (**Fig. 2K**), while the rate of change within blocks (i.e. slopes) stayed constant (**Fig. 2I**).  
193 To quantify this across birds we measured the change over the course of learning in both the  
194 magnitude of immediate shifts (estimated as the intercepts from linear fits) and the rate of  
195 within-block learning (estimated as the slopes from linear fits). As for the example bird, we  
196 found that the rate of learning within each block stayed constant over time for all five birds  
197 (**Fig. 2L**). In contrast, the magnitude of immediate shifts increased over time for all birds  
198 (**Fig. 2L**). These analyses indicate that adjustments to sequence probability reflect two  
199 dissociable processes, an immediate cue-dependent shift in sequence probability at the  
200 beginning of blocks, that increases with contextual training, and a gradual adaptation of  
201 sequence probability within blocks, that does not increase with contextual training.

202

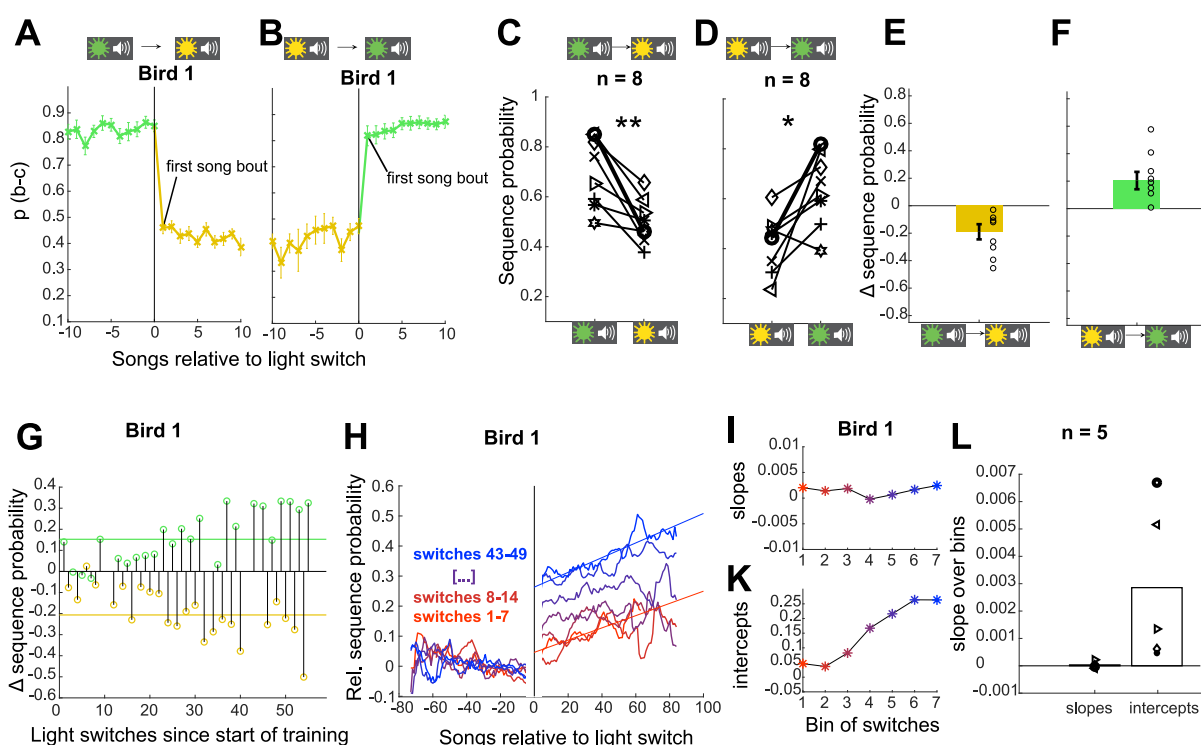

203

204 **Figure 2. Sequence probabilities shift immediately following a switch in context.**

205 **A-B:** Average sequence probability per song for example Bird 1 aligned to switches from  
 206 green to yellow context (A) and from yellow to green context (B). Error bars indicate SEM  
 207 across song bouts (n = 35 switches (A), n = 33 switches (B)). **C:** Changes in sequence  
 208 probability from the last song in green context to the first song in yellow context for all  
 209 8 birds. Example bird in A-B highlighted in bold. \*\* p < 0.01 signed-rank test. **D:** Changes  
 210 in sequence probability from the last song in yellow context to the first song in green  
 211 context. \* p < 0.05 signed rank test. **E:** Shift magnitudes for all birds, defined as the changes  
 212 in sequence probability from the last five songs in the green context to the first five songs  
 213 in the yellow context. Open circles show individual birds, error bars indicate SEM across  
 214 birds. **F:** Same as E for switches from yellow to green. **G:** Shift magnitudes over training  
 215 time for the example bird (11 days and 49 context switches; seven of the original  
 216 56 context switches are excluded from calculations of shift magnitudes because at least  
 217 one of the involved blocks contained only one or two song bouts.). **H:** Trajectory of switch-  
 218 aligned sequence probabilities for the example bird early in training (red) and late in  
 219 training (blue). Probabilities are normalized by the sequence probability in preceding  
 220 block, and plotted so that the adaptive direction is positive for both switch directions (i.e.  
 221 inverting the probabilities for switches to yellow.) **I:** Slopes of fits to the sequence  
 222 probability trajectories over song bouts within block. Units in change of relative sequence  
 223 probability per song bout. **K:** Intercepts of fits to sequence probability trajectories over  
 224 song bouts within block. Units in relative sequence probability. **L:** Changes in slopes and  
 225 changes in intercepts for five birds over the training process, determined as the slopes of  
 226 linear fits to curves as in I,K for each bird.  
 227

228 **Visual cues in the absence of reinforcement are sufficient to evoke sequencing changes**

229 The ability of Bengalese finches to implement an immediate shift in sequencing on the first  
 230 rendition in a block – and thus before they have a chance to learn from reinforcing feedback –

231 argues that they can maintain context-specific motor memories and use contextual visual cues  
232 to anticipate correct sequencing in each context. To explicitly test whether birds can flexibly  
233 switch between sequencing appropriate for distinct contexts using only visual cues, we included  
234 short probe blocks which presented the same light cues without WN stimulation. Probe blocks  
235 were interspersed in the sequence of training blocks so that each switch between types of blocks  
236 was possible and, on average, every third switch was into a probe block (see Methods, 10 of  
237 34 blocks in sequence). Light switches into probe blocks were associated with similar  
238 magnitude shifts in sequence probability as switches into WN blocks of the corresponding color  
239 (-0.22 +/- 0.06 to both yellow WN and yellow probe blocks from green WN blocks,  $p = 0.94$ ,  
240 signed rank test; 0.24 +/- 0.06 to green WN and 0.23 +/- 0.07 to green probe blocks from yellow  
241 WN blocks,  $p = 0.64$ , signed rank test). As the most direct test of evoked sequencing changes  
242 with light cues alone, we compared songs immediately before and after switches between probe  
243 blocks without intervening WN training blocks (probe-probe switches). **Figure 3A,B** shows  
244 song bouts for one example bird (Bird 2) which were sung consecutively across a switch from  
245 yellow probe to green probe blocks. In the first song following the probe-probe switch, the  
246 yellow target sequence ('f-ab') was more prevalent, and the green target sequence ('n-ab') was  
247 less prevalent, and such an immediate effect was also apparent in the average sequence  
248 probabilities for this bird aligned to probe-probe switches (**Fig. 3C,D**). Similar immediate and  
249 appropriately directed shifts in sequencing at switches between probe blocks were observed for  
250 all 8 birds (**Fig. 3E,F**,  $p < 0.05$  signed rank test,  $n=8$ ), with average shifts in sequence  
251 probabilities of -0.21 +/-0.09 and 0.17 +/-0.08 (**Fig. 3G,H**). The presence of such changes in  
252 the first songs sung after probe-probe switches indicates that visual cues alone are sufficient to  
253 cause anticipatory, learned shifts between syllable sequences.

254

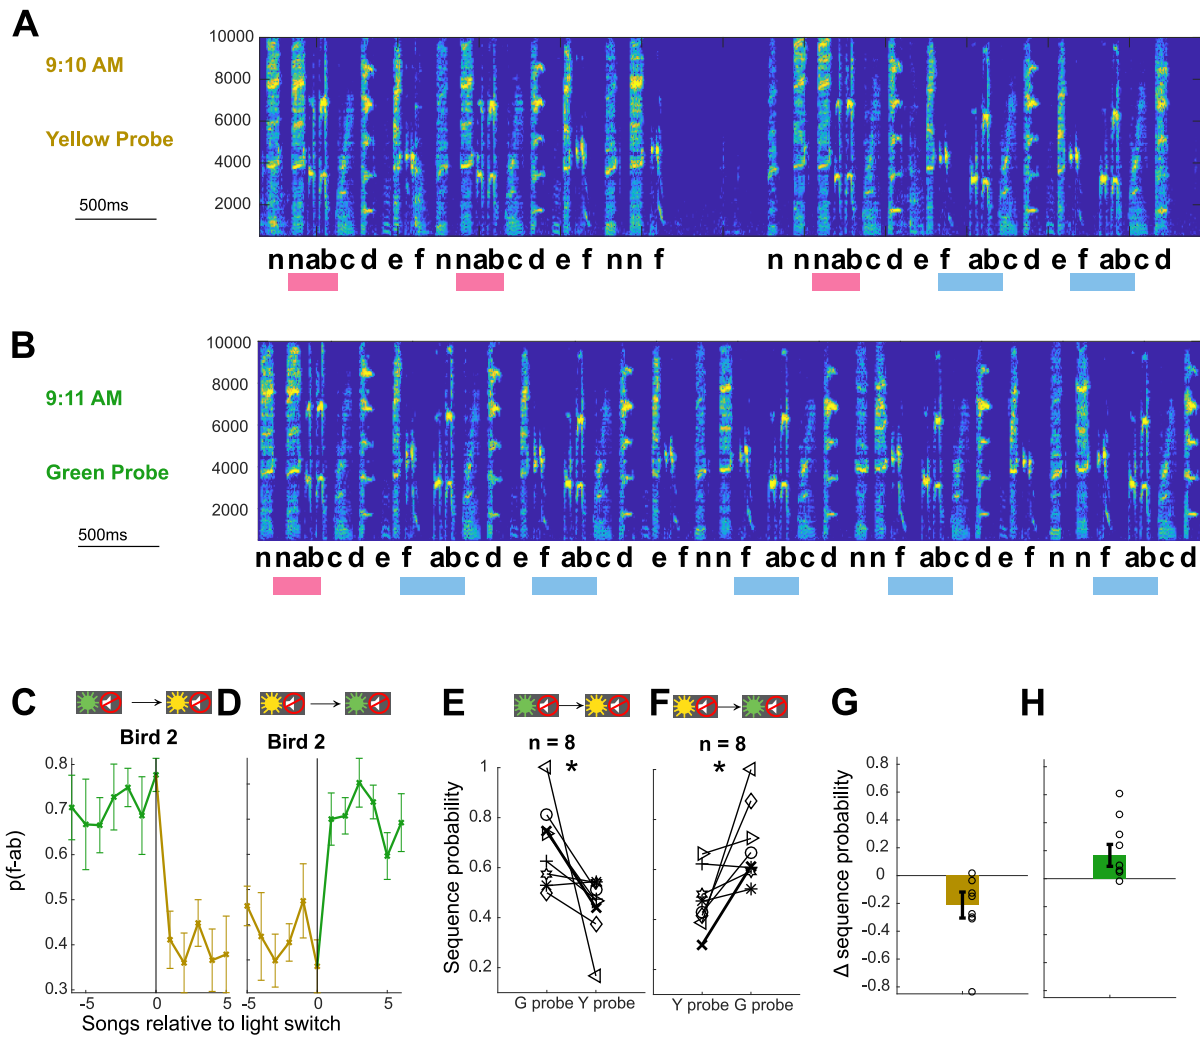

255

256 **Figure 3. Contextual cues alone are sufficient to enable immediate shifts in syllable**  
 257 **sequencing.**

258 **A,B:** Examples of songs sung by Bird 2 immediately before (A) and after (B) a switch from  
 259 a yellow probe block to a green probe block (full song bouts in Sup. Fig. 3). Scale for x-axis  
 260 is 500ms, y-axis shows frequency in Hz. **C,D:** Average sequence probability per song for  
 261 Bird 2 aligned to switches from green probe to yellow probe blocks (C) and from yellow  
 262 probe to green probe blocks (D). Error bars indicate SEM across song bouts (n = 14  
 263 switches (C), 11 switches (D)).

264 **E,F:** Average sequence probabilities for all eight birds at the switch from the last song in  
 265 green probe context and the first song in yellow probe context, and vice versa. Example  
 266 Bird 2 is shown in bold. \* p < 0.05 signed rank test. **G,H:** Shift magnitudes for probe-probe  
 267 switches for all birds. Open circles show individual birds, error bars indicate SEM across  
 268 birds.

269

270 **Contextual changes are specific to target sequences**

271 A decrease in the probability of a target sequence in response to contextual cues must reflect  
 272 changes in the probabilities of transitions leading up to the target sequence. However, such  
 273 changes could be restricted to the transitions that immediately precede the target sequence, or

274 alternatively could affect other transitions throughout the song. For example, for the experiment  
275 illustrated in Figure 1, the prevalence of the target sequence ‘ab-d’ was appropriately decreased  
276 in the yellow context, in which it was targeted. The complete transition diagram and  
277 corresponding transition matrix for this bird (**Fig. 4A,B**) reveal that there were four distinct  
278 branch points at which syllables were variably sequenced (after ‘cr’, ‘wr’, ‘i’, and ‘aab’).  
279 Therefore, the decrease in the target sequence ‘ab-d’ could have resulted exclusively from an  
280 increase in the probability of the alternative transition ‘ab-c’ at the branch point following ‘aab’.  
281 However, a reduction in the prevalence of the target sequence could also have been achieved  
282 by changes in the probability of transitions earlier in song such that the sequence ‘aab’ was  
283 sung less frequently. To investigate how specific contextual changes in probability were to  
284 transitions immediately preceding target sequences, we calculated the difference between  
285 transition matrices in the yellow and green probe contexts (**Fig. 4C**). This difference matrix  
286 indicates that changes to transition probabilities were highly specific to the branch point  
287 immediately preceding the target sequences (specificity was defined as the proportion of total  
288 changes which occurred at the branch points immediately preceding target sequences;  
289 specificity for branch point ‘aab’ was 83.2%). Such specificity to branch points that  
290 immediately precede target sequences was typical across experiments, including cases in which  
291 different branch points preceded each target sequence (**Fig. 4D-F**, specificity 96.9%). Across  
292 all 8 experiments, the median specificity of changes to the most proximal branch points was  
293 84.95%, and only one bird, which was also the worst learner in the contextual training  
294 paradigm, had a specificity of less than 50% (**Fig. 4G**). Hence, contextual changes were specific  
295 to target sequences and did not reflect the kind of global sequencing changes that characterize  
296 innate social modulation of song structure (Sakata et al., 2008; Sossinka & Böhner, 1980).  
297

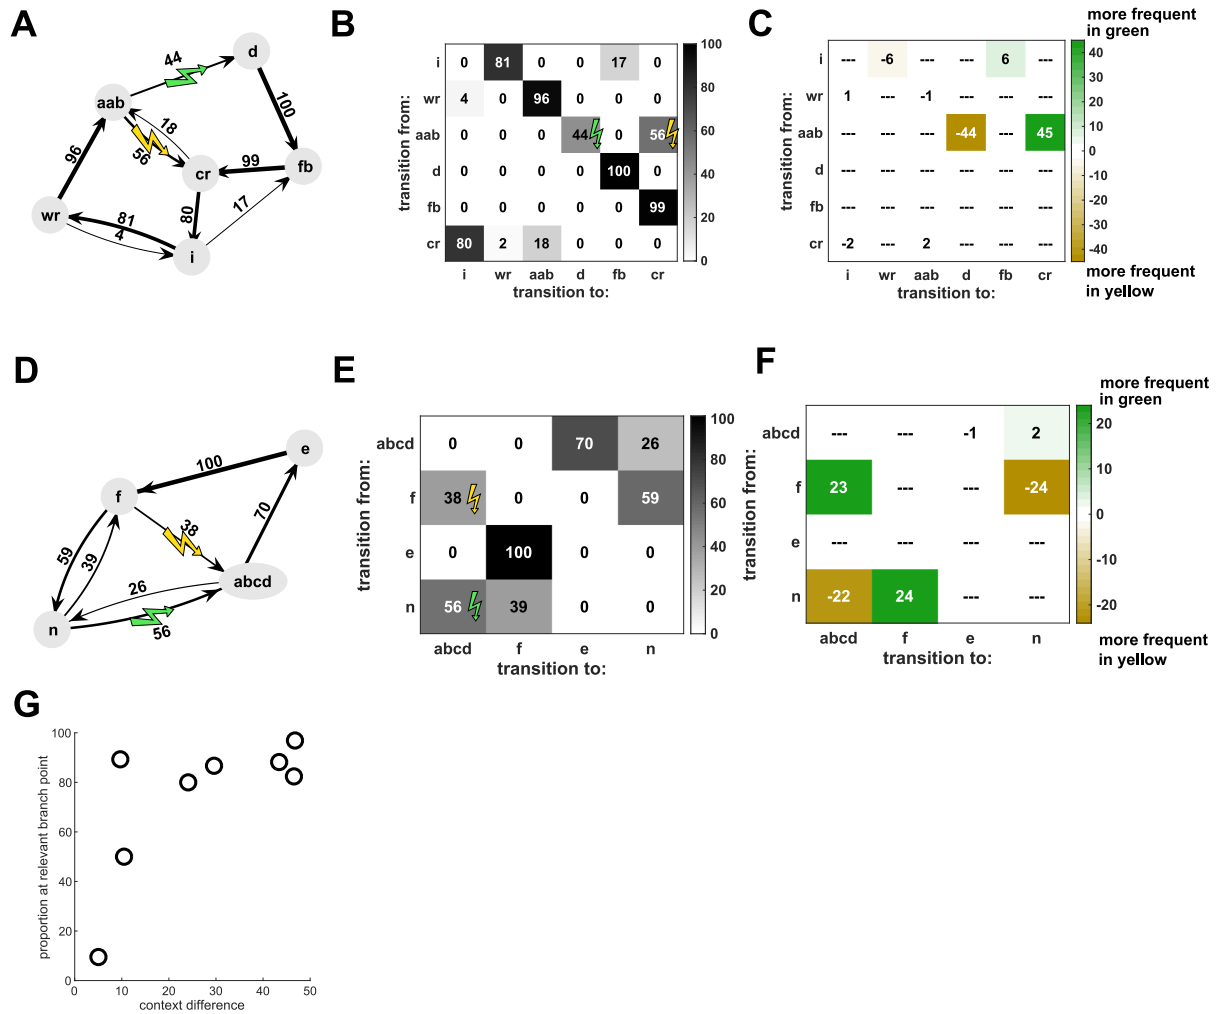

298

299 **Figure 4. Contextual changes are local to the target sequences**

300 **A:** Transition diagram for the song of Bird 6 (spectrogram in Fig. 1) in yellow probe  
 301 context. Sequences of syllables with fixed transition patterns (e.g. 'aab') as well as repeat  
 302 phrases and introductory notes have been summarized as single states to simplify the  
 303 diagram. **B:** Transition matrix for the same bird, showing same data as in A. **C:** Differences  
 304 between the two contexts are illustrated by subtracting the transition matrix in the yellow  
 305 context from the one in the green context, so that sequence transitions which are more  
 306 frequent in green context are positive (colored green) and sequence transitions which are  
 307 more frequent in yellow are negative (colored yellow). For this bird, the majority of  
 308 contextual differences occurred at the branch point ('aab') which most closely preceded  
 309 the target sequences ('ab-c' and 'ab-d'), while very little contextual difference occurred at  
 310 the other three branch points ('i', 'wr', 'cr'). **D-F:** Same for Bird 2 for which two different  
 311 branch points ('f' and 'n') preceded the target sequences ('f-abcd' and 'n-abcd')  
 312 (spectrogram in Fig. 3).

313 **G:** Proportion of changes at the branch point(s) most closely preceding the target  
 314 sequences, relative to the total magnitude of context differences for each bird (see  
 315 Methods). Most birds exhibited high specificity of contextual changes to the relevant  
 316 branch points.

317

318 **Distinct sequence probabilities are specifically associated with different visual cues**

319 Our experiments establish that birds can shift between two distinct sequencing states in  
320 response to contextual cues. In order to test whether birds were capable of learning to shift to  
321 these two states from a third neutral context, we trained a subset of three birds with three  
322 different color-cued contexts. For these birds, after completion of training with WN targeted to  
323 distinct sequences in yellow and green contexts (as described above), we introduced interleaved  
324 blocks cued by white light in which there was no reinforcement. After this additional training,  
325 switches from the unreinforced context elicited changes in opposite directions for the green and  
326 yellow contexts (example bird **Fig. 5A**). All birds ( $n = 3$ ) showed adaptive sequencing changes  
327 for the first song bout in probe blocks (**Fig. 5B,C**) as well as immediate shifts in the adaptive  
328 directions for all color contexts (**Fig. 5D**,  $0.11 \pm 0.04$  and  $0.19 \pm 0.05$  for switches to green  
329 WN and green probe blocks, respectively;  $-0.15 \pm 0.06$  and  $-0.09 \pm 0.02$  for switches to yellow  
330 WN and yellow probe blocks, respectively). While additional data would be required to  
331 establish the number of distinct associations between contexts and sequencing states that can  
332 be learned, these findings suggest that birds can maintain at least two distinct sequencing states  
333 separate from a 'neutral' state, and use specific associations between cue colors and sequencing  
334 states to rapidly shift sequencing in distinct directions for each context.

335

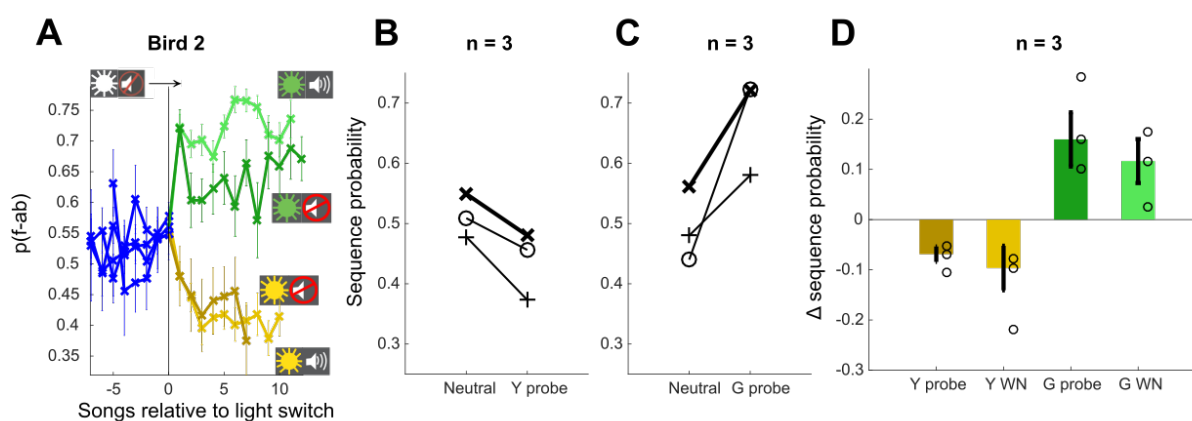

336  
337

338 **Figure 5. Contextual cues allow shifts in both directions**

339 **A:** Sequence probability for Bird 2 at the switch from neutral context to yellow and green  
340 WN contexts, as well as yellow and green probe contexts (no WN). Error bars indicate  
341 SEM across song bouts (n = 68 switches (green WN), 78 switches (yellow WN),  
342 27 switches (green probe), 24 switches (yellow probe)). **B,C:** Sequence probabilities for  
343 three birds for the last song in neutral context and the first song in the following probe  
344 context. Example bird in A highlighted in bold. **D:** Shift magnitude for three birds at the  
345 switch from neutral context to all other contexts. Open circles show individual birds, error  
346 bars indicate SEM across birds.  
347

348

## 349 **Discussion**

350

351 Speech, thought, and many other behaviors are composed of ordered sequences of simpler  
352 elements. The flexible control of sequencing is thus a fundamental aspect of cognition and  
353 motor function (Aldridge & Berridge, 2002; X. Jin & Costa, 2015; Tanji, 2001). While the  
354 flexibility of human speech is unrivaled, our contextual training paradigm revealed a simpler,  
355 parallel capacity in birds to produce distinct vocal sequences in response to arbitrary contextual  
356 cues. The colors of the cues had no prior relevance to the birds, so that their meaning had to be  
357 learned as a new association between cues and the specific vocal sequences that were  
358 contextually appropriate (i.e. that escaped white noise, given the current cues). Learned  
359 modulation of sequencing was immediately expressed in response to changes in cues, persisted  
360 following termination of training, and was largely restricted to the targeted sequences, without  
361 gross modifications of global song structure. Hence, for song, like speech, the ordering of vocal  
362 elements can be rapidly and specifically reconfigured to achieve learned, contextually  
363 appropriate goals. This shared capacity for moment-by-moment control of vocal sequencing in  
364 humans and songbirds suggests that the avian song system could be an excellent model for  
365 investigating how neural circuits enable flexible and adaptive reconfiguration of motor output  
366 in response to different cognitive demands.

367

368 *Flexible control of vocalizations*



369 Our demonstration of contextual control over the ordering of vocal elements in the songbird  
370 builds on previous work showing that a variety of animals can learn to emit or withhold innate  
371 vocalizations in response to environmental or experimentally imposed cues. For example, non-  
372 human primates and other animals can produce alarm calls that are innate in their acoustic  
373 structure, but that are deployed in a contextually appropriate fashion (Nieder & Mooney, 2020;  
374 T. N. Suzuki & Zuberbühler, 2019; Wheeler & Fischer, 2012). Similarly, animals, including  
375 birds, can be trained to control their vocalizations in an experimental setting, by reinforcing the  
376 production of innate vocalizations in response to arbitrary cues to obtain food or water rewards  
377 (Brecht, Hage, Gavrilov, & Nieder, 2019; Hage & Nieder, 2013; Nieder & Mooney, 2020;  
378 Reichmuth & Casey, 2014). In relation to these prior findings, our results demonstrate a  
379 capacity to flexibly reorganize the sequencing of learned vocal elements, rather than select from  
380 a fixed set of innate vocalizations, in response to arbitrary cues. This ability to contextually  
381 control the ordering, or syntax, of specifically targeted syllable transitions within the overall  
382 structure of learned song parallels the human capacity to differentially sequence a fixed set of  
383 syllables in speech.

384  
385 The ability to alter syllable sequencing in a flexible fashion also contrasts with prior studies that  
386 have demonstrated modulation of vocalizations in more naturalistic settings. For example,  
387 songs produced in the context of courtship and territorial or aggressive encounters (“directed  
388 song”) differ in acoustic structure from songs produced in isolation (“undirected song”) (Sakata  
389 et al., 2008; Searcy & Beecher, 2009). This modulation of song structure by social context is  
390 characterized by global changes to the intensity of song production, with directed songs  
391 exhibiting faster tempo, and greater stereotypy of both syllable structure and syllable  
392 sequencing, than undirected songs (Sakata et al., 2008; Searcy & Beecher, 2009; Sossinka &  
393 Böhner, 1980). This and other ethologically relevant modulation of song intensity may serve to  
394 communicate the singer’s affective state, such as level of arousal or aggression (Alcami et al.,

395 2021; Hedley, Denton, & Weiss, 2017; Heinig et al., 2014), and may largely reflect innate  
396 mechanisms (James, Dai, & Sakata, 2018b; Kojima & Doupe, 2011) mediated by hypothalamic  
397 and neuromodulatory inputs to premotor regions (Berwick et al., 2011; Gadagkar, Puzerey, &  
398 Goldberg, 2019; James, Dai, & Sakata, 2018b; Nieder & Mooney, 2020). In contrast, here we  
399 show that birds can learn to locally modulate specific features of their songs (i.e. individually  
400 targeted syllable transitions) in response to arbitrarily assigned contextual cues that have no  
401 prior ethological relevance.

402

### 403 *Evolution of control over vocal sequencing*

404 The capacity for moment-by-moment adjustment of vocalizations in response to arbitrary  
405 learned cues may depend on similar capacities that evolved to enable appropriate modulation  
406 of vocalizations in ethologically relevant natural contexts. For example, some species of  
407 songbirds preferentially sing different song types depending on factors such as time of day,  
408 location of the singer, or the presence of an audience (Alcami et al., 2021; Hedley et al., 2017;  
409 King & McGregor, 2016; Searcy & Beecher, 2009; Trillo & Vehrencamp, 2005). Even birds  
410 with only a single song type, such as Bengalese finches, vary parameters of their song  
411 depending on social context, including the specific identity of the listener (Chen et al., 2016;  
412 Heinig et al., 2014; Sakata et al., 2008). The ability to contextually control vocalizations is also  
413 relevant for the customization of vocal signatures for purposes of individual and group  
414 recognition (Vignal, Mathevon, & Mottin, 2004), and to avoid overlap and enhance  
415 communication during vocal turn-taking and in response to environmental noises (Benichov &  
416 Vallentin, 2020; Brumm & Zollinger, 2013). Such capacities for vocal control likely reflect  
417 evolutionary advantages of incorporating sensory and contextual information about  
418 conspecifics and the environment in generating increasingly sophisticated vocal signaling. Our  
419 results indicate a latent capacity to integrate arbitrary sensory signals into the adaptive  
420 deployment of vocalizations in songbirds, and suggest that some of the contextual control

421 observed in natural settings may likewise rely on learned associations and other cognitive  
422 factors. Perhaps evolutionary pressures to develop nuanced social communication led to the  
423 elaboration of cortical (pallial) control over brainstem vocal circuitry (Hage & Nieder, 2016),  
424 and thereby established a conduit that facilitated the integration of progressively more abstract  
425 cues and internal states in that control.

426

#### 427 Neural implementation of context-dependent vocal motor sequencing

428 The ability of birds to switch between distinct motor programs using visual cues is reminiscent  
429 of contextual speech and motor control studies in humans. For example, human subjects in both  
430 laboratory studies and natural settings can learn multiple ‘states’ of vocal motor adaptation, and  
431 rapidly switch between them using contextual information (Houde & Jordan, 2002; Keough &  
432 Jones, 2011; Rochet-Capellan & Ostry, 2011). Similarly, subjects can learn two separate states  
433 of motor adaptation for other motor skills such as reaching, and switch between them using  
434 cues or other cognitive strategies (Cunningham & Welch, 1994). Models of such context-  
435 dependent motor adaptation frequently assume at least two parallel processes (Abrahamse,  
436 Ruitenberg, De Kleine, & Verwey, 2013; Ashe, Lungu, Basford, & Lu, 2006; Green &  
437 Abutalebi, 2013; Hikosaka et al., 1999; Lee & Schweighofer, 2009; McDougle, Ivry, & Taylor,  
438 2016; Rochet-Capellan & Ostry, 2011; Wolpert, Diedrichsen, & Flanagan, 2011), one that is  
439 more flexible, and sensitive to contextual information (McDougle et al., 2016), and a second  
440 that cannot readily be associated with contextual cues and is only gradually updated during  
441 motor adaptation (Howard, Wolpert, & Franklin, 2013). Specifically, in support of such a two-  
442 process model, Imamizu and colleagues (Imamizu & Kawato, 2009; Imamizu et al., 2007)  
443 found that contextual information can drive rapid shifts in adaptation at the beginning of new  
444 blocks, without affecting the rate of adaptation within blocks. The similar separation in our  
445 study between rapid context-dependent shifts in sequence probability at the onset of blocks, and  
446 gradual adaptation within blocks that does not improve with training (**Fig. 2 G-L**), suggests that

447 such contextual sequence learning in the Bengalese finch may also be enabled by two distinct  
448 processes.

449  
450 Humans studies of two-process models suggest that slow adaptation occurs primarily within  
451 primary motor structures, while fast context-dependent state switches, including for cued  
452 switching between languages in bilinguals, engage more frontal areas involved in executive  
453 control (Bialystok, 2017; Blanco-Elorrieta & Pylkkänen, 2016; De Baene, Duyck, Brass, &  
454 Carreiras, 2015; Imamizu & Kawato, 2009). In songbirds, the gradual adaptation of sequence  
455 probabilities within blocks might likewise be controlled by motor and premotor song control  
456 structures, while visual contextual cues could be processed in avian structures analogous to  
457 mammalian prefrontal cortex, outside the song system. For example, the association area  
458 nidopallium caudolaterale (Güntürkün, 2005), is activated by arbitrary visual cues that encode  
459 learned rules (Veit & Nieder, 2013; Veit, Pidpruzhnykova, & Nieder, 2015), and this or other  
460 avian association areas (Jarvis et al., 2013) may serve as an intermediate representation of the  
461 arbitrary contextual cues that can drive rapid learned shifts in syllable sequencing.

462  
463 At the level of song motor control, our results indicate a greater capacity for rapid and flexible  
464 adjustment of syllable transition probabilities than previously appreciated. Current models of  
465 song production include networks of neurons in the vocal premotor nucleus HVC responsible  
466 for the temporal control of individual syllables, that are linked together by activity in a recurrent  
467 loop through brainstem vocal centers (Andalman, Foerster, & Fee, 2011; Ashmore, Wild, &  
468 Schmidt, 2005; Cohen et al., 2020; Hamaguchi, Tanaka, & Mooney, 2016). At branch points in  
469 songs with variable syllable sequencing, one influential model posits that which syllable  
470 follows a branch point is determined by stochastic processes that depend on the strength of the  
471 connections between alternative syllable production networks, and thus dynamics local to HVC  
472 (D. Z. Jin, 2009; D. Z. Jin & Kozhevnikov, 2011; Troyer, Brainard, & Bouchard, 2017; Zhang,

473 Wittenbach, Jin, & Kozhevnikov, 2017). Such models could account for a gradual adjustment  
474 of sequence probabilities over a period of hours or days (Lipkind et al., 2013; Warren et al.,  
475 2012) through plasticity of motor control parameters, such as the strength of synaptic  
476 connections within HVC. However, our results demonstrate that there is not a single set of  
477 relatively fixed transition probabilities that undergo gradual adjustments, as could be captured  
478 in synaptic connectivity of branched syllable control networks. Rather, the song system has the  
479 capacity to maintain distinct representations of transition probabilities and can immediately  
480 switch between those in response to visual cues. HVC receives a variety of inputs that  
481 potentially could convey such visual or cognitive influences on sequencing (Bischof &  
482 Engelage, 1985; Cynx, 1990; Seki, Suzuki, Takahasi, & Okanoya, 2008; Ullrich, Norton, &  
483 Scharff, 2016; Wild, 1994), and one of these inputs, Nif, has previously been shown to be  
484 relevant for sequencing (Hosino & Okanoya, 2000; Vyssotski, Stepien, Keller, & Hahnloser,  
485 2016). It therefore is likely that the control of syllable sequence in Bengalese finches involves  
486 a mix of processes local to nuclei of the song motor pathway (Basista et al., 2014; Zhang et al.,  
487 2017) as well as inputs that convey a variety of sensory feedback and contextual information.  
488 The well-understood circuitry of the avian song system makes this an attractive model to  
489 investigate how such top-down pathways orchestrate the kind of contextual control of  
490 vocalizations demonstrated in this study, and more broadly to uncover how differing cognitive  
491 demands can flexibly and adaptively reconfigure motor output.  
492

## 493 **Methods**

494

### 495 *Subjects & Sound recordings*

496 The experiments were carried out on eight adult male Bengalese finches (*Lonchura striata*)  
497 obtained from the lab's breeding colony (age range 128-320 days post hatch, median 178 days,  
498 at start of experiment). Birds were placed in individual sound-attenuating boxes with  
499 continuous monitoring and auditory recording of song. Song was recorded using an  
500 omnidirectional microphone above the cage. We used custom software for the online  
501 recognition of target syllables and real-time delivery of short 40ms bursts of white noise (WN)  
502 depending on the syllable sequence (Tumer & Brainard, 2007; Warren et al., 2012). All  
503 procedures were performed in accordance with animal care protocols approved by the  
504 University of California, San Francisco Institutional Animal Care and Use Committee  
505 (IACUC).

506

### 507 *Training procedure and blocks*

508 Bengalese finch song consists of a discrete number of vocal elements, called syllables, that are  
509 separated by periods of silence. At the start of each experiment, a template was generated to  
510 recognize a specific sequence of syllables (the target sequence) for each bird based on their  
511 unique spectral structure. In the context-dependent auditory feedback protocol, the target  
512 sequence that received aversive white noise (WN) feedback switched between blocks of  
513 different light contexts. Colored LEDs (superbrightleds.com, St. Louis, MO; green 520 nm,  
514 amber 600 nm) produced two visually distinct environments (green and yellow) to serve as  
515 contextual cues to indicate which sequences would elicit WN and which would 'escape' (i.e.  
516 not trigger WN). We wanted to test whether the birds would be able to associate song changes  
517 with any arbitrary visual stimulus, therefore there was no reason to choose these specific colors,  
518 and the birds' color perception in this range should not matter, as long as they were able to

519 discriminate the colors. The entire day was used for data acquisition by alternating the two  
520 possible light contexts. We determined sensitivity and specificity of the template to the target  
521 sequence on a randomly selected set of 20 song bouts on which labels and delivery of WN was  
522 hand-checked. Template sensitivity was defined as:  $\text{sensitivity} = (\text{number of correct hits}) / (\text{total}$   
523  $\text{number of target sequences})$ . The average template sensitivity across experiments was 91.3%  
524 (range 75.2-100%). Template specificity was defined as:  $\text{specificity} = (\text{number of correct}$   
525  $\text{escapes}) / (\text{number of correct escapes plus number of false alarms})$ , where correct escapes were  
526 defined as the number of target sequences of the currently inactive context that were not hit by  
527 WN, and false alarms were defined as any WN that was delivered either on the target sequence  
528 of the currently inactive context, or anywhere else in song. The average template specificity  
529 was 96.7% (range 90.6-100%).

530  
531 At the start of each experiment, before WN training, songs were recorded during a baseline  
532 period in which cage illumination was switched between colors at random intervals. Songs from  
533 this baseline period were separately analyzed for each light color to confirm that there was no  
534 systematic, unlearned effect of light cues on sequencing before training. During initial training,  
535 cage illumination was alternatingly switched between colors at random intervals. Intervals were  
536 drawn from uniform distributions which differed between birds (60-150min (4 birds), 10-30min  
537 (2 birds), 60-240min (1 bird), 30-150min (1 bird)). Different training schedules were assigned  
538 to birds arbitrarily and were not related to a bird's performance. After an extended period of  
539 training (average 33 days, range 12-79 days), probe blocks without WN were included, to test  
540 whether sequencing changes could be elicited by visual cues alone. During this period, probe  
541 blocks were interspersed with WN training blocks. Probe blocks made up approximately one  
542 third of total blocks (10 of 34 blocks in the sequence) and 7-35% of total time, depending on  
543 the bird. The duration of probe blocks was typically shorter or equal to the duration of WN  
544 blocks (10-30min for 6 birds, 30-120min for one bird, 18-46min for one bird). The total duration

545 of the experiment, consisting of baseline, training, and probe periods, was on average 52 days.  
546 During this period, birds sang 226 (range 66-356) bouts per day during baseline days and 258  
547 (range 171-368) bouts per day during the period of probe collection at the end of training (14%  
548 increase). The average duration of song bouts also changed little, with both the average number  
549 of target sequences per bout (8.7 during baseline, 7.7 during probes, 7% decrease) and the  
550 average number of syllables per bout (74 during baseline, 71 during probes, 2% decrease)  
551 decreasing slightly. In addition to the eight birds that completed this training paradigm, three  
552 birds were started on contextual training but never progressed to testing with probe blocks,  
553 because they did not exhibit single-context learning (n=1); because of technical issues with  
554 consistent targeting at branch points, (n=1); or because they lost sequence variability during  
555 initial stages of training (n=1); these birds are excluded from the results. Of the 8 birds that  
556 completed training, three birds exhibited relatively small context-dependent changes in  
557 sequencing (**Fig. 1H**). We examined several variables to assess whether they could account for  
558 differences in the magnitude of learning across birds, including the bird's age, overall transition  
559 entropy of the song (Katahira, Suzuki, Kagawa, & Okanoya, 2013), transition entropy at the  
560 targeted branch points (Warren et al., 2012), as well as the distance between the WN target and  
561 the closest preceding branch point in the sequence. None of these variables were significantly  
562 correlated with the degree of contextual learning that birds expressed (**Sup. Fig. 4A-D**) and  
563 consequently all birds were treated as a single group in analysis and reporting of results. In a  
564 subset of experiments (n=3), after completing measurements with probe blocks, we added a  
565 third, neutral context (**Fig. 5**), signaled by white light, in which there was no WN reinforcement.

566

### 567 *Syllable sequence annotation*

568 Syllable annotation for data analysis was performed offline. Each continuous period of singing  
569 that was separated from others by at least two seconds of silence was treated as an individual  
570 'song', or 'song bout'. Song was bandpass filtered between 500 Hz and 10000 Hz and



571 segmented into syllables and gaps based on amplitude threshold and timing parameters  
572 determined manually for each bird. A small sample of songs (approximately 20 song bouts)  
573 was then annotated manually based on visual inspection of spectrograms. These data were used  
574 to train an offline autolabeler ('hybrid-vocal-classifier', (Nicholson, 2021)) which was then  
575 used to label the remaining song bouts. Autolabeled songs were processed further in a semi-  
576 automated way depending on each bird's unique song, for example to separate or merge  
577 syllables that were not segmented correctly (detected by their duration distributions), to deal  
578 with WN covering syllables (detected by its amplitude), and to correct autolabeling errors  
579 detected based on the syllable sequence. A subset of songs was inspected manually for each  
580 bird to confirm correct labeling.

581

### 582 *Sequence probability analyses*

583 Sequence probability was first calculated within each song bout as the frequency of the yellow  
584 target sequence relative to the total number of yellow and green target sequences:

585 
$$p = \frac{n(\text{target}_Y)}{n(\text{target}_Y) + n(\text{target}_G)}$$
. Note that this differs from transition probabilities at branch points

586 in song in that it ignores possible additional syllable transitions at the branch point, and does  
587 not require the targeted sequences to be directly following the same branch point. For example  
588 for the experiment in **Figure 3**, the target sequences were 'n-ab' and 'f-ab', so the syllable  
589 covered by WN ('b' in both contexts) was 2-3 syllables removed from the respective branch  
590 point in the syllable sequence ('n-f' vs. 'n-a', or 'f-n' vs. 'f-a'). Note also that units of sequence  
591 probability are in percent, therefore reported changes in percentages (for example Fig. 1H,  
592 2E,F) describe absolute changes in sequence probability, which reflect the proportion of each  
593 target sequence, not percent changes. Song bouts that did not contain either of the two target  
594 sequences were discarded. In the plots of sequence probability over several days in **Figure 1A-**  
595 **C**, we calculated sequence probability for all bouts on a given day (average n=1854 renditions  
596 of both target sequences per day). We estimated 95% confidence intervals by approximation

597 with a normal distribution as  $p \pm z * \sqrt{\frac{p*(1-p)}{n}}$  with  $n = n(target\_Y) + n(target\_G)$  and  $z$   
598 =1.96. Context switches were processed to include only switches between adjacent blocks  
599 during the same day, i.e. excluding overnight switches and treating blocks as separate contexts  
600 if one day started with the same color that had been the last color on the previous day. If a bird  
601 did not produce any song during one block, this block was merged with any neighboring block  
602 of the same color (for example, green probe without songs before green WN, where the context  
603 switch would not be noticeable for the bird). If the light color switched twice (or more) without  
604 any song bouts, those context switches were discarded.

605

606 In order to reduce variability associated with changes across individual song bouts, shift  
607 magnitude was calculated as the difference between the first five song bouts in the new context  
608 and the last five song bouts in the old context. Only context switches with at least 3 song bouts  
609 in each adjacent block were included in analyses of shift magnitude. In plots showing songs  
610 aligned to context switches, the x-axis is limited to show only points for which at least half of  
611 the blocks contributed data (i.e. in **Fig. 2D**, half of the green probe blocks contained at least 6  
612 songs). All statistical tests were performed with MATLAB. We used non-parametric tests to  
613 compare changes across birds (Wilcoxon ranksum test for unpaired data, Wilcoxon signed rank  
614 test for paired data), because with only 8 birds/data points, it is more conservative to assume  
615 that data are not Gaussian distributed.

616

### 617 *Analysis of acquisition*

618 In order to investigate how context-dependent performance developed over training (**Fig. 2 G-**  
619 **L**), we quantified changes to sequence probabilities across block switches for 5 birds for which  
620 we had a continuous record from the onset of training. Sequence probability curves (e.g. **Fig.**  
621 **2 H**) for yellow switches were inverted so that both yellow and green switches were plotted in

622 the same direction, aligned by the time of context switches, and were cut off at a time point  
623 relative to context switches where fewer than five switches contributed data. We then subtracted  
624 the mean pre-switch value from each sequence probability curve. For visual display of the  
625 example bird, sequence probability curves were smoothed with a 9 bout boxcar window, and  
626 displayed in bins of 7 context switches. To calculate the slope of slopes and slope of intercepts  
627 (**Fig. 2 L**), we calculated a linear fit to the post-switch parts of the unsmoothed sequence  
628 probability curve for each individual context switch.

629

### 630 *Specificity to relevant branch points*

631 To calculate the specificity of the context difference to the targeted branch points in song, we  
632 generated transition diagrams for each bird. To simplify the diagrams, introductory notes were  
633 summarized into a single introductory state. Introductory notes were defined for each bird as  
634 up to three syllables occurring at the start of song bouts before the main motif, which tended to  
635 be quieter, more variable, with high probabilities to repeat and to transition to other introductory  
636 notes. Repeat phrases were also summarized into a single state. Motifs, or chunks, in the song  
637 with fixed order of syllables were identified by the stereotyped transitions and short gap  
638 durations between syllables in the motif (Isola, Vochin, & Sakata, 2020; Suge & Okanoya,  
639 2009) and were also summarized as a single state in the diagram. Sometimes, the same syllable  
640 can be part of several fixed chunks (Katahira et al., 2013), in which case it may appear several  
641 times in the transition diagram. We then calculated the difference between the transition  
642 matrices for the two probe contexts at each transition that was a branch point (defined as more  
643 than 3% and less than 97% transition probability). These context differences were split into  
644 ‘targeted branch points’ i.e. the branch point or branch points most closely preceding the target  
645 sequences in the two contexts, and ‘non-targeted branch points’ i.e. all other branch points in  
646 the song. We calculated the proportion of absolute contextual difference in the transition matrix  
647 that fell to the targeted branch points, for example for the matrix in **Figure 4C**

648  $(44+45)/(44+45+6+6+1+1+2+2) = 83.2\%$ . Typically, birds with clear contextual differences at  
649 the target sequence also had high specificity of sequence changes to the targeted branch points.

650

651 To calculate the transition entropy of baseline song, we again summarized introductory notes  
652 into a single introductory state. In addition, the same syllable as part of multiple fixed motifs,  
653 or in multiple positions within the same fixed motif, were renamed as different syllables, so as  
654 not to count as sequence variability what was really a stereotyped sequence (i.e. a-b 50% and  
655 b-c 50% in the fixed sequence 'abbc'). Transition entropy was then calculated as in (Katahira

656 et al., 2013):  $H = - \sum_x p(x) \sum_y p(y|x) \log p(y|x)$  with x denoting the preceding syllable and y denoting  
657 the current syllable, over all syllables in the song.

658

## 659 **Acknowledgements**

660

661 We thank Alla Karpova, Jon Sakata, Dave Mets, William Mehaffey, Assaf Breska, Guy  
662 Avraham for helpful discussions and comments on earlier versions of this manuscript. This  
663 work was supported by the Howard Hughes Medical Institute. Lena Veit was supported as a  
664 Howard Hughes Medical Institute Fellow of the Life Sciences Research Foundation and by a  
665 postdoctoral fellowship from Leopoldina German National Academy of Sciences. Christian J  
666 Monroy Hernandez was supported by an HHMI EXROP summer fellowship.

667

## 668 **Competing interests:**

669 The authors declare no competing interests.

670 **Supplementary Figures**  
671

9:10 AM Yellow Probe

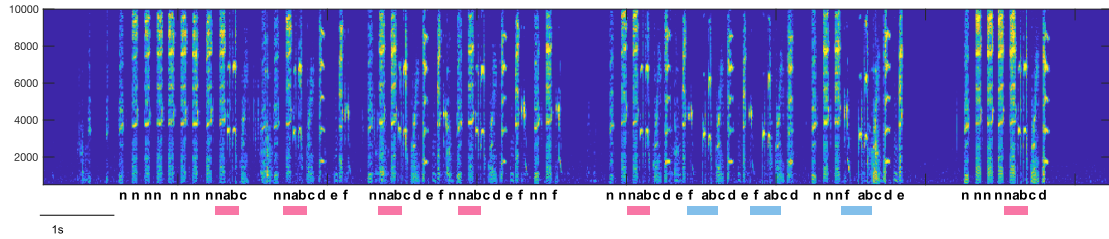

9:11 AM Green Probe

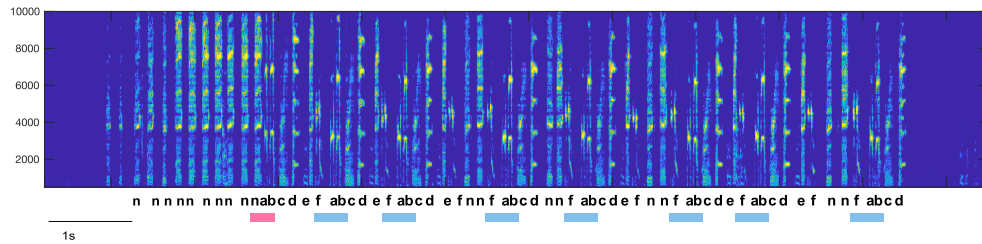

672  
673  
674  
675  
676  
677  
678  
679  
680

**Supplement to Figure 3: Example song bouts surrounding a probe-probe context switch**  
Full song bouts (same as in Fig.3 A,B) sung by Bird 2 immediately before and after a switch from a yellow probe block to a green probe block. Scale for x-axis is 1s, y-axis shows frequency in Hz. The recording program was set to never switch lights during an ongoing song recording, so the time of light switch in between these two recordings cannot be shown.

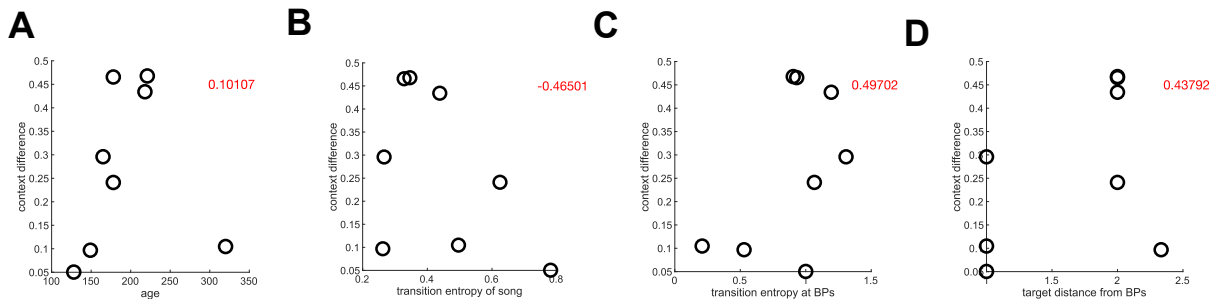

681  
682 **Supplement to Figure 4: Possible explanations for differences in contextual learning**  
683  
684 Correlations of the magnitude of contextual differences with the birds' age (A), transition  
685 entropy of the entire song (B), transition entropy at the branch points preceding the target  
686 sequences (C) and distance of the target sequence from the immediately preceding branch  
687 points (D). None of these variables were significantly correlated with the degree of contextual  
688 learning that birds expressed,  $p=0.81$  (A),  $p=0.24$  (B),  $p=0.21$  (C),  $p=0.28$  (D). Red numbers  
689 indicate correlation coefficients.

## 690 References

- 691  
692 Abrahamse, E., Ruitenberg, M., De Kleine, E., & Verwey, W. B. (2013). Control of  
693 automated behavior: insights from the discrete sequence production task. *Frontiers*  
694 *in Human Neuroscience*, 7. <http://doi.org/10.3389/fnhum.2013.00082>  
695 Ackermann, H., Hage, S. R., & Ziegler, W. (2014). Brain mechanisms of acoustic  
696 communication in humans and nonhuman primates: an evolutionary perspective.  
697 *The Behavioral and Brain Sciences*, 37(6), 568–9– discussion 577–604.  
698 <http://doi.org/10.1017/S0140525X13003099>  
699 Alcami, P., Ma, S., & Gahr, M. (2021). Telemetry reveals rapid duel-driven song plasticity  
700 in a naturalistic social environment. *bioRxiv*, 803411.  
701 Aldridge, J. W., & Berridge, K. C. (2002). Coding of Behavioral Sequences in the Basal  
702 Ganglia. In *The Basal Ganglia VII* (Vol. 52, pp. 53–66). Boston, MA: Springer, Boston,  
703 MA. [http://doi.org/10.1007/978-1-4615-0715-4\\_7](http://doi.org/10.1007/978-1-4615-0715-4_7)  
704 Andalman, A. S., Foerster, J. N., & Fee, M. S. (2011). Control of vocal and respiratory  
705 patterns in birdsong: dissection of forebrain and brainstem mechanisms using  
706 temperature. *PloS One*, 6(9), e25461. <http://doi.org/10.1371/journal.pone.0025461>  
707 Ashe, J., Lungu, O. V., Basford, A. T., & Lu, X. (2006). Cortical control of motor sequences.  
708 *Current Opinion in Neurobiology*, 16(2), 213–221.  
709 <http://doi.org/10.1016/j.conb.2006.03.008>  
710 Ashmore, R. C., Wild, J. M., & Schmidt, M. F. (2005). Brainstem and forebrain  
711 contributions to the generation of learned motor behaviors for song. *The Journal of*  
712 *Neuroscience*, 25(37), 8543–8554. [http://doi.org/10.1523/JNEUROSCI.1668-](http://doi.org/10.1523/JNEUROSCI.1668-05.2005)  
713 05.2005  
714 Basista, M. J., Elliott, K. C., Wu, W., Hyson, R. L., Bertram, R., & Johnson, F. (2014).  
715 Independent Premotor Encoding of the Sequence and Structure of Birdsong in Avian  
716 Cortex. *The Journal of Neuroscience*, 34(50), 16821–16834.  
717 <http://doi.org/10.1523/JNEUROSCI.1940-14.2014>  
718 Belyk, M., & Brown, S. (2017). The origins of the vocal brain in humans. *Neuroscience and*  
719 *Biobehavioral Reviews*, 77, 177–193.  
720 <http://doi.org/10.1016/j.neubiorev.2017.03.014>  
721 Benichov, J. I., & Vallentin, D. (2020). Inhibition within a premotor circuit controls the  
722 timing of vocal turn-taking in zebra finches. *Nature Communications*, 11(1), 1–10.  
723 <http://doi.org/10.1038/s41467-019-13938-0>  
724 Berwick, R. C., Okanoya, K., Beckers, G. J. L., & Bolhuis, J. J. (2011). Songs to syntax: the  
725 linguistics of birdsong. *Trends in Cognitive Sciences*, 15(3), 113–121.  
726 <http://doi.org/10.1016/j.tics.2011.01.002>  
727 Bialystok, E. (2017). The bilingual adaptation: How minds accommodate experience.  
728 *Psychological Bulletin*, 143(3), 233–262. <http://doi.org/10.1037/bul0000099>  
729 Bischof, H. J., & Engelage, J. (1985). Flash evoked responses in a song control nucleus of  
730 the zebra finch (*Taeniopygia guttata castanotis*). *Brain Research*, 326(2), 370–374.  
731 Blanco-Elorrieta, E., & Pylkkänen, L. (2016). Bilingual Language Control in Perception  
732 versus Action: MEG Reveals Comprehension Control Mechanisms in Anterior  
733 Cingulate Cortex and Domain-General Control of Production in Dorsolateral  
734 Prefrontal Cortex. *The Journal of Neuroscience*, 36(2), 290–301.  
735 <http://doi.org/10.1523/JNEUROSCI.2597-15.2016>  
736 Brainard, M. S., & Doupe, A. J. (2002). What songbirds teach us about learning. *Nature*,  
737 417(6886), 351–358. <http://doi.org/10.1038/417351a>

- 738 Brecht, K. F., Hage, S. R., Gavrilov, N., & Nieder, A. (2019). Volitional control of  
739 vocalizations in corvid songbirds. *PLoS Biology*, *17*(8), e3000375.  
740 <http://doi.org/10.1371/journal.pbio.3000375>
- 741 Brumm, H., & Zollinger, S. A. (2013). Avian Vocal Production in Noise. In *Animal*  
742 *Communication and Noise* (2nd ed., Vol. 2, pp. 187–227). Berlin, Heidelberg:  
743 Springer, Berlin, Heidelberg. [http://doi.org/10.1007/978-3-642-41494-7\\_7](http://doi.org/10.1007/978-3-642-41494-7_7)
- 744 Chen, Y., Matheson, L. E., & Sakata, J. T. (2016). Mechanisms underlying the social  
745 enhancement of vocal learning in songbirds. *Proceedings of the National Academy of*  
746 *Sciences*, *113*(24), 6641–6646. <http://doi.org/10.1073/pnas.1522306113>
- 747 Cohen, Y., Shen, J., Semu, D., Leman, D. P., Liberti, W. A., Perkins, L. N., et al. (2020).  
748 Hidden neural states underlie canary song syntax. *Nature*, *582*(7813), 539–544.  
749 <http://doi.org/10.1038/s41586-020-2397-3>
- 750 Cunningham, H. A., & Welch, R. B. (1994). Multiple concurrent visual-motor mappings:  
751 implications for models of adaptation. *Journal of Experimental Psychology. Human*  
752 *Perception and Performance*, *20*(5), 987–999. [http://doi.org/10.1037//0096-](http://doi.org/10.1037//0096-1523.20.5.987)  
753 [1523.20.5.987](http://doi.org/10.1037//0096-1523.20.5.987)
- 754 Cynx, J. (1990). Experimental determination of a unit of song production in the zebra  
755 finch (*Taeniopygia guttata*). *Journal of Comparative Psychology*, *104*(1), 3–10.
- 756 De Baene, W., Duyck, W., Brass, M., & Carreiras, M. (2015). Brain Circuit for Cognitive  
757 Control Is Shared by Task and Language Switching. *Journal of Cognitive Neuroscience*,  
758 *27*(9), 1752–1765.
- 759 Doupe, A. J., & Kuhl, P. K. (1999). Birdsong and human speech: common themes and  
760 mechanisms. *Annual Review of Neuroscience*, *22*(1), 567–631.  
761 <http://doi.org/10.1146/annurev.neuro.22.1.567>
- 762 Gadagkar, V., Puzerey, P. A., & Goldberg, J. H. (2019). Dopamine neurons change their  
763 tuning according to courtship context in singing birds. *bioRxiv*, 822817.  
764 <http://doi.org/10.1101/822817>
- 765 Green, D. W., & Abutalebi, J. (2013). Language control in bilinguals: The adaptive control  
766 hypothesis. *Journal of Cognitive Psychology (Hove, England)*, *25*(5), 515–530.  
767 <http://doi.org/10.1080/20445911.2013.796377>
- 768 Güntürkün, O. (2005). The avian “prefrontal cortex” and cognition. *Current Opinion in*  
769 *Neurobiology*, *15*(6), 686–693.
- 770 Hage, S. R., & Nieder, A. (2013). Single neurons in monkey prefrontal cortex encode  
771 volitional initiation of vocalizations. *Nature Communications*, *4*(1), 2409.  
772 <http://doi.org/10.1038/ncomms3409>
- 773 Hage, S. R., & Nieder, A. (2016). Dual Neural Network Model for the Evolution of Speech  
774 and Language. *Trends in Neurosciences*, *39*(12), 813–829.  
775 <http://doi.org/10.1016/j.tins.2016.10.006>
- 776 Hamaguchi, K., Tanaka, M., & Mooney, R. (2016). A Distributed Recurrent Network  
777 Contributes to Temporally Precise Vocalizations. *Neuron*, *91*(3), 680–693.  
778 <http://doi.org/10.1016/j.neuron.2016.06.019>
- 779 Hauser, M. D., Chomsky, N., & Fitch, W. T. (2002). The faculty of language: what is it, who  
780 has it, and how did it evolve? *Science*, *298*(5598), 1569–1579.  
781 <http://doi.org/10.1126/science.298.5598.1569>
- 782 Hedley, R. W., Denton, K. K., & Weiss, R. E. (2017). Accounting for syntax in analyses of  
783 countersinging reveals hidden vocal dynamics in a songbird with a large repertoire.  
784 *Animal Behaviour*, *131*, 23–32. <http://doi.org/10.1016/j.anbehav.2017.06.021>
- 785 Heinig, A., Pant, S., Dunning, J., Bass, A., Coburn, Z., & Prather, J. F. (2014). Male mate  
786 preferences in mutual mate choice: finches modulate their songs across and within

- 787 male-female interactions. *Animal Behaviour*, 97, 1–12.  
788 <http://doi.org/10.1016/j.anbehav.2014.08.016>
- 789 Hikosaka, O., Nakahara, H., Rand, M. K., Sakai, K., Lu, X., Nakamura, K., et al. (1999).  
790 Parallel neural networks for learning sequential procedures. *Trends in*  
791 *Neurosciences*, 22(10), 464–471. [http://doi.org/10.1016/S0166-2236\(99\)01439-3](http://doi.org/10.1016/S0166-2236(99)01439-3)
- 792 Hosino, T., & Okanoya, K. (2000). Lesion of a higher-order song nucleus disrupts phrase  
793 level complexity in Bengalese finches. *NeuroReport*, 11(10), 2091–2095.
- 794 Houde, J. F., & Jordan, M. I. (2002). Sensorimotor Adaptation of Speech I.  
795 [http://doi.org/10.1044/1092-4388\(2002/023\)](http://doi.org/10.1044/1092-4388(2002/023))
- 796 Howard, I. S., Wolpert, D. M., & Franklin, D. W. (2013). The effect of contextual cues on  
797 the encoding of motor memories. *Journal of Neurophysiology*, 109(10), 2632–2644.  
798 <http://doi.org/10.1152/jn.00773.2012>
- 799 Imamizu, H., & Kawato, M. (2009). Brain mechanisms for predictive control by switching  
800 internal models: implications for higher-order cognitive functions. *Psychological*  
801 *Research*, 73(4), 527–544. <http://doi.org/10.1007/s00426-009-0235-1>
- 802 Imamizu, H., Sugimoto, N., Osu, R., Tsutsui, K., Sugiyama, K., Wada, Y., & Kawato, M.  
803 (2007). Explicit contextual information selectively contributes to predictive  
804 switching of internal models. *Experimental Brain Research*, 181(3), 395–408.  
805 <http://doi.org/10.1007/s00221-007-0940-1>
- 806 Isola, G. R., Vochin, A., & Sakata, J. T. (2020). Manipulations of inhibition in cortical  
807 circuitry differentially affect spectral and temporal features of Bengalese finch song.  
808 *Journal of Neurophysiology*. <http://doi.org/10.1152/jn.00142.2019>
- 809 Jaffe, P. I., & Brainard, M. S. (2020). Acetylcholine acts on songbird premotor circuitry to  
810 invigorate vocal output. <http://doi.org/10.7554/eLife.53288>
- 811 James, L. S., Dai, J. B., & Sakata, J. T. (2018a). Ability to modulate birdsong across social  
812 contexts develops without imitative social learning. *Biology Letters*, 14(3),  
813 20170777. <http://doi.org/10.1098/rsbl.2017.0777>
- 814 James, L. S., Dai, J. B., & Sakata, J. T. (2018b). Ability to modulate birdsong across social  
815 contexts develops without imitative social learning. *Biology Letters*, 14(3),  
816 20170777. <http://doi.org/10.1098/rsbl.2017.0777>
- 817 Jarvis, E. D., Yu, J., Rivas, M. V., Horita, H., Feenders, G., Whitney, O., et al. (2013). Global  
818 view of the functional molecular organization of the avian cerebrum: Mirror images  
819 and functional columns. *The Journal of Comparative Neurology*, 521(16), 3614–3665.  
820 <http://doi.org/10.1002/cne.23404>
- 821 Jin, D. Z. (2009). Generating variable birdsong syllable sequences with branching chain  
822 networks in avian premotor nucleus HVC. *Physical Review. E, Statistical, Nonlinear,*  
823 *and Soft Matter Physics*, 80(5 Pt 1), 051902.  
824 <http://doi.org/10.1103/PhysRevE.80.051902>
- 825 Jin, D. Z., & Kozhevnikov, A. A. (2011). A compact statistical model of the song syntax in  
826 Bengalese finch. *PLoS Computational Biology*, 7(3), e1001108–e1001108.  
827 <http://doi.org/10.1371/journal.pcbi.1001108>
- 828 Jin, X., & Costa, R. M. (2015). Shaping action sequences in basal ganglia circuits. *Current*  
829 *Opinion in Neurobiology*, 33, 188–196. <http://doi.org/10.1016/j.conb.2015.06.011>
- 830 Katahira, K., Suzuki, K., Kagawa, H., & Okanoya, K. (2013). A simple explanation for the  
831 evolution of complex song syntax in Bengalese finches. *Biology Letters*, 9(6),  
832 20130842–20130842. <http://doi.org/10.1098/rsbl.2013.0842>
- 833 Keough, D., & Jones, J. A. (2011). Contextual cuing contributes to the independent  
834 modification of multiple internal models for vocal control. *Journal of*  
835 *Neurophysiology*. <http://doi.org/10.1152/jn.00291.2010>



- 836 King, S. L., & McGregor, P. K. (2016). Vocal matching: the what, the why and the how.  
837 *Biology Letters*, 12(10). <http://doi.org/10.1098/rsbl.2016.0666>
- 838 Kojima, S., & Doupe, A. J. (2011). Social performance reveals unexpected vocal  
839 competency in young songbirds. *Proceedings of the National Academy of Sciences of*  
840 *the United States of America*, 108(4), 1687–1692.  
841 <http://doi.org/10.1073/pnas.1010502108>
- 842 Lee, J.-Y., & Schweighofer, N. (2009). Dual Adaptation Supports a Parallel Architecture of  
843 Motor Memory. *The Journal of Neuroscience*, 29(33), 10396–10404.  
844 <http://doi.org/10.1523/JNEUROSCI.1294-09.2009>
- 845 Lipkind, D., Marcus, G. F., Bemis, D. K., Sasahara, K., Jacoby, N., Takahasi, M., et al. (2013).  
846 Stepwise acquisition of vocal combinatorial capacity in songbirds and human  
847 infants. *Nature*, 498(7452), 104–108. <http://doi.org/10.1038/nature12173>
- 848 McDougle, S. D., Ivry, R. B., & Taylor, J. A. (2016). Taking Aim at the Cognitive Side of  
849 Learning in Sensorimotor Adaptation Tasks. *Trends in Cognitive Sciences*, 20(7), 535–  
850 544. <http://doi.org/10.1016/j.tics.2016.05.002>
- 851 Nicholson, D. (2021). NickleDave/hybrid-vocal-classifier:.  
852 <http://doi.org/10.5281/zenodo.4678768>
- 853 Nieder, A., & Mooney, R. (2020). The neurobiology of innate, volitional and learned  
854 vocalizations in mammals and birds. *Philosophical Transactions of the Royal Society*  
855 *B*, 375(1789), 20190054. <http://doi.org/10.1098/rstb.2019.0054>
- 856 Okanoya, K. (2004). The Bengalese finch: a window on the behavioral neurobiology of  
857 birdsong syntax. *Annals of the New York Academy of Sciences*, 1016, 724–735.  
858 <http://doi.org/10.1196/annals.1298.026>
- 859 Reichmuth, C., & Casey, C. (2014). Vocal learning in seals, sea lions, and walruses.  
860 *Current Opinion in Neurobiology*, 28, 66–71.  
861 <http://doi.org/10.1016/j.conb.2014.06.011>
- 862 Rochet-Capellan, A., & Ostry, D. J. (2011). Simultaneous acquisition of multiple auditory-  
863 motor transformations in speech. *The Journal of Neuroscience*, 31(7), 2657–2662.  
864 <http://doi.org/10.1523/JNEUROSCI.6020-10.2011>
- 865 Sakata, J. T., Hampton, C. M., & Brainard, M. S. (2008). Social Modulation of Sequence and  
866 Syllable Variability in Adult Birdsong. *Journal of Neurophysiology*, 99(4), 1700–1711.  
867 <http://doi.org/10.1152/jn.01296.2007>
- 868 Searcy, W. A., & Beecher, M. D. (2009). Song as an aggressive signal in songbirds. *Animal*  
869 *Behaviour*, 78(6), 1281–1292. <http://doi.org/10.1016/j.anbehav.2009.08.011>
- 870 Seki, Y., Suzuki, K., Takahasi, M., & Okanoya, K. (2008). Song Motor control organizes  
871 acoustic patterns on two levels in Bengalese finches (*Lonchura striata* var.  
872 *domestica*). *J Comp Physiol a*, 194(6), 533–543. [http://doi.org/10.1007/s00359-008-](http://doi.org/10.1007/s00359-008-0328-0)  
873 [0328-0](http://doi.org/10.1007/s00359-008-0328-0)
- 874 Simonyan, K., & Horwitz, B. (2011). Laryngeal motor cortex and control of speech in  
875 humans. *The Neuroscientist : a Review Journal Bringing Neurobiology, Neurology and*  
876 *Psychiatry*, 17(2), 197–208. <http://doi.org/10.1177/1073858410386727>
- 877 Sossinka, R., & Böhner, J. (1980). Song Types in the Zebra Finch *Poephila guttata*  
878 *castanotis*. *Zeitschrift Für Tierpsychologie*, 53(2), 123–132.  
879 <http://doi.org/10.1111/j.1439-0310.1980.tb01044.x>
- 880 Suge, R., & Okanoya, K. (2009). Perceptual chunking in the self-produced songs of  
881 Bengalese finches (*Lonchura striata* var. *domestica*). *Animal Cognition*, 13(3), 515–  
882 523. <http://doi.org/10.1007/s10071-009-0302-4>
- 883 Suzuki, T. N., & Zuberbühler, K. (2019). Animal syntax. *Current Biology*, 29(14), R669–  
884 R671. <http://doi.org/10.1016/j.cub.2019.05.045>

- 885 Tanji, J. (2001). Sequential organization of multiple movements: involvement of cortical  
886 motor areas. *Annual Review of Neuroscience*, 24(1), 631–651.  
887 <http://doi.org/10.1146/annurev.neuro.24.1.631>
- 888 Trillo, P. A., & Vehrencamp, S. L. (2005). Song types and their structural features are  
889 associated with specific contexts in the banded wren. *Animal Behaviour*, 70(4), 921–  
890 935. <http://doi.org/10.1016/j.anbehav.2005.02.004>
- 891 Troyer, T. W., Brainard, M. S., & Bouchard, K. E. (2017). Timing during transitions in  
892 Bengalese finch song: implications for motor sequencing. *Journal of Neurophysiology*,  
893 118(3), 1556–1566. <http://doi.org/10.1152/jn.00296.2017>
- 894 Tumer, E. C., & Brainard, M. S. (2007). Performance variability enables adaptive  
895 plasticity of “crystallized” adult birdsong. *Nature*, 450(7173), 1240–1244.  
896 <http://doi.org/10.1038/nature06390>
- 897 Ullrich, R., Norton, P., & Scharff, C. (2016). Waltzing Taeniopygia: integration of  
898 courtship song and dance in the domesticated Australian zebra finch. *Animal*  
899 *Behaviour*, 112, 285–300. <http://doi.org/10.1016/j.anbehav.2015.11.012>
- 900 Veit, L., & Nieder, A. (2013). Abstract rule neurons in the endbrain support intelligent  
901 behaviour in corvid songbirds. *Nature Communications*, 4:2878.  
902 <http://doi.org/10.1038/ncomms3878>
- 903 Veit, L., Pidpruzhnykova, G., & Nieder, A. (2015). Associative learning rapidly establishes  
904 neuronal representations of upcoming behavioral choices in crows. *Proceedings of*  
905 *the National Academy of Sciences of the United States of America*, 112(49), 15208–  
906 15213. <http://doi.org/10.1073/pnas.1509760112>
- 907 Vignal, C., Mathevon, N., & Mottin, S. (2004). Audience drives male songbird response to  
908 partner’s voice. *Nature*, 430(6998), 448–451. <http://doi.org/10.1038/nature02645>
- 909 Vyssotski, A. L., Stepien, A. E., Keller, G. B., & Hahnloser, R. H. R. (2016). A Neural Code  
910 That Is Isometric to Vocal Output and Correlates with Its Sensory Consequences.  
911 *PLoS Biology*, 14(10), e2000317. <http://doi.org/10.1371/journal.pbio.2000317>
- 912 Warren, T. L., Charlesworth, J. D., Tumer, E. C., & Brainard, M. S. (2012). Variable  
913 sequencing is actively maintained in a well learned motor skill. *The Journal of*  
914 *Neuroscience*, 32(44), 15414–15425. <http://doi.org/10.1523/JNEUROSCI.1254-12.2012>
- 915
- 916 Wheeler, B. C., & Fischer, J. (2012). Functionally referential signals: a promising  
917 paradigm whose time has passed. *Evolutionary Anthropology*, 21(5), 195–205.  
918 <http://doi.org/10.1002/evan.21319>
- 919 Wild, J. M. (1994). Visual and somatosensory inputs to the avian song system via nucleus  
920 uvulaeformis (Uva) and a comparison with the projections of a similar thalamic  
921 nucleus in a nonsongbird, *Columba livia*. *The Journal of Comparative Neurology*,  
922 349(4), 512–535. <http://doi.org/10.1002/cne.903490403>
- 923 Wolpert, D. M., Diedrichsen, J., & Flanagan, J. R. (2011). Principles of sensorimotor  
924 learning. *Nature Reviews Neuroscience*, 12(12), 739–751.  
925 <http://doi.org/10.1038/nrn3112>
- 926 Zhang, Y. S., Wittenbach, J. D., Jin, D. Z., & Kozhevnikov, A. A. (2017). Temperature  
927 Manipulation in Songbird Brain Implicates the Premotor Nucleus HVC in Birdsong  
928 Syntax. *The Journal of Neuroscience*, 37(10), 2600–2611.  
929 <http://doi.org/10.1523/JNEUROSCI.1827-16.2017>
- 930
